# Supplementary material for: An uncommon highly oxidized multiple bonded Re28+ species
Source: Royal Society of Chemistry journal article supplement (doi:10.1039/c1cc13193a), 2011-01-01
Supplement: c1cc13193a.pdf [file c1cc13193a.pdf]

## Supporting Information

### An uncommon highly oxidized multiple bonded $\text{Re}_2^{8+}$ species

Gina M. Chiarella, F. Albert Cotton and Carlos A. Murillo\*

#### Experimental

Unless otherwise noted, the synthesis was carried out under an inert atmosphere using standard Schlenk techniques. Commercially available starting materials such as  $(\text{Bu}^n_4\text{N})_2\text{Re}_2\text{Cl}_8$  and silver triflate were purchased from Sigma-Aldrich and used as received. The rhenium precursor  $\text{Re}_2(\text{hpp})_4(\text{O}_3\text{SCF}_3)_2$  was prepared using a published method.<sup>i</sup> Solvents were dried using a Glass Contour solvent system. Elemental analyses were performed by Robertson Microlit, Madison, NJ on material that had been placed under vacuum for three days. The infrared spectrum was recorded on a Perkin-Elmer 16PC FT IR spectrophotometer using KBr pellets. The electronic spectrum was recorded on a Shimadzu UV-2501 PC spectrophotometer. Electrochemical measurements were carried out in 0.1 M  $\text{Bu}^n_4\text{NPF}_6$  solution in  $\text{CH}_2\text{Cl}_2$  using a CH Instruments Model-CH1620A electrochemical analyzer with Pt working and auxiliary electrodes, Ag/AgCl reference electrode, and operated with a scan rate of 100  $\text{mV}\cdot\text{s}^{-1}$ . Potentials are referenced to the Ag/AgCl electrode.  $^1\text{H}$  NMR data were recorded on a Mercury 300 spectrometer with chemical shifts referenced to the protonated solvent residue.

**Synthesis of  $\{[\text{Re}_2(\text{hpp})_4(\text{O}_3\text{SCF}_3)_2](\text{O}_3\text{SCF}_3)_2\}$ , **1**.** To a flask charged with a solution of 41 mg (0.16 mmol) of  $\text{Ag}(\text{SO}_3\text{CF}_3)$  in 20 mL of methylene chloride was added 100 mg (0.080 mmol) of  $\text{Re}_2(\text{hpp})_4(\text{O}_3\text{SCF}_3)_2$  dissolved in 10 mL of methylene chloride. The color of the supernatant liquid changed immediately from purple to green. The reaction mixture was stirred at ambient temperature for 2 h and then filtered to remove a dark-colored silver residue. After removal of the solvent under vacuum, a deep green solid was obtained in essentially quantitative yield. Anal. Calcd for

$C_{32}H_{48}N_{12}S_4O_{12}F_{12}Re_2$ : C, 25.26; H, 3.18; N, 11.05%. Found: C, 25.09; H, 3.54; N, 11.27%.  $^1H$  NMR ( $CDCl_3$ , ppm): 3.37 (m, 32H), 2.04 (m, 16H).

**Synthesis of  $\{[Re_2(hpp)_3(OH)(O_3SCF_3)]_2(\mu-O)_2\}(O_3SCF_3)_2 \cdot 4CH_2Cl_2, 2 \cdot 4CH_2Cl_2$ .** This was done similarly to that of **1** but once the silver residue was filtered off the volume of the filtrate was reduced to ca. 15 mL and then a layer of previously deoxygenated but un-dried hexanes was carefully placed on top of the solution. After two weeks, dark brownish-green crystals were collected by filtration, and washed with dry hexanes. Yield: 83 mg, 80%. Anal. Calcd for  $C_{46}H_{74}N_{18}S_4O_{16}F_{12}Re_4$ : C, 24.70; H, 3.33; N, 11.27%. Found: C, 24.54; H, 3.38, N, 11.50%. IR ( $cm^{-1}$ ): 3316 (s), 2960 (m), 2863 (m), 1630 (m), 1553 (s), 1476 (m), 1385 (s), 1316 (s), 1223 (s), 1161 (m), 1029 (s), 909 (m), 766 (m), 637 (m).  $^1H$  NMR ( $CDCl_3$ , ppm): 3.25 (m, 48H), 1.95 (m, 24H), 1.17 (s, 2H).  $^1H$  NMR ( $C_6D_6$ ): 2.61 (m, 24H), 2.05 (m, 24H), 1.04 (m, 24H), 0.91 (s, 2H). UV-vis ( $\lambda_{max}$ , nm): 260, 359, 441 and 606.

**X-ray Structure Determination.** Diffraction data were collected at 213 K on a Bruker SMART 1000 CCD area detector system using omega scans of 0.3 deg/frame with exposition of 40 sec/frame. Cell parameters were determined using the SMART software suite.<sup>ii</sup> Data reduction and integration was performed with the SAINT.<sup>iii</sup> An absorption correction was applied using the program SADABS.<sup>iv</sup> Positions of the Re atoms were located via direct methods with the aid of the program SHELXTL.<sup>v</sup> Subsequent cycles of least-squares refinement followed by difference Fourier syntheses revealed the positions of the remaining non-hydrogen atoms. Hydrogen atoms were added in idealized positions. All hydrogen atoms were included in the calculation of the structure factors. Non-hydrogen atoms were refined with anisotropic displacement parameters. Four sections of the structure showed some degree of disorder. This was handled as follows: a) a carbon atom in a methylene group of one of the hpp ligands was refined with partial occupancies of 0.62384 and 0.37616; b) three interstitial  $CH_2Cl_2$  molecules presented disorder and it was resolved by refinement using partial occupancies; c) two oxygen atoms of a triflate

ligand that was bound to a rhenium atom were refined with partial occupancies of 0.54272 and 0.45728;  
d) a sulfur and two oxygen atoms in an unbound triflate anion were refined with partial occupancies of 0.52112 and 0.47888. For **2**, the structure was solved in the triclinic space group  $P\bar{1}$ . Selected bond distances and angles are listed in Table 1 and crystallographic data are provided in Table 2.

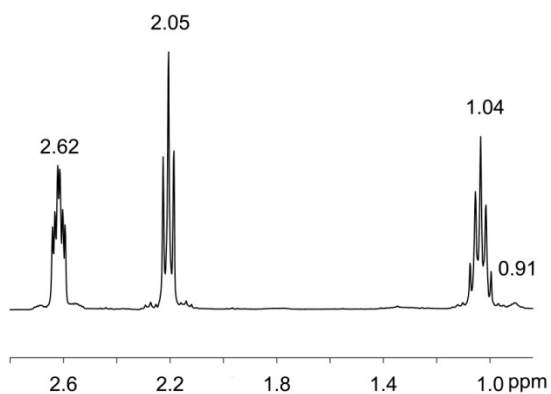

**Fig S1**  $^1\text{H}$  NMR spectrum of **2** in  $\text{C}_6\text{D}_6$ .

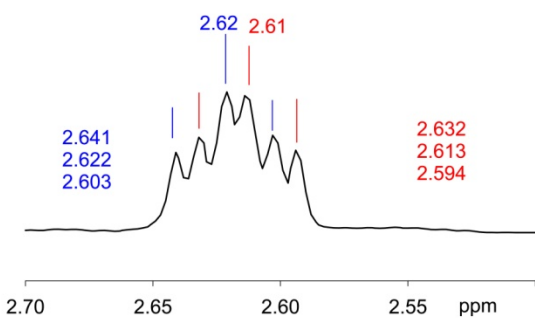

**Fig S2** Expansion of the signal centered at 2.61-2.62 ppm in the  $^1\text{H}$  NMR spectrum of **2** in  $\text{C}_6\text{D}_6$ .

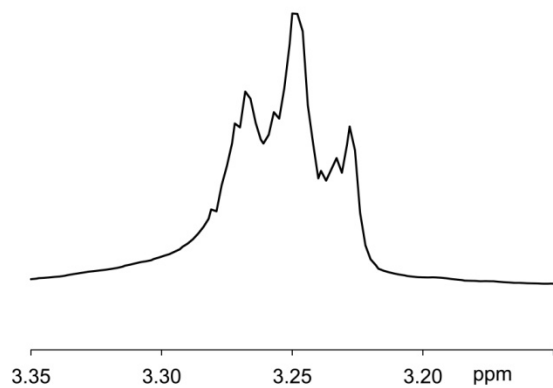

**Fig S3** Expansion of the signal centered at  $\sim 3.35$  ppm in the  $^1\text{H}$  NMR spectrum of **1** in  $\text{CDCl}_3$ .

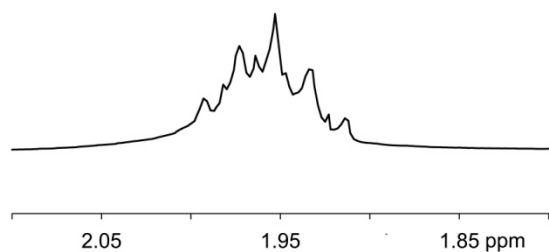

**Fig S4** Expansion of the signal centered at ~1.95 ppm in the <sup>1</sup>H NMR spectrum of **1** in CDCl<sub>3</sub>.

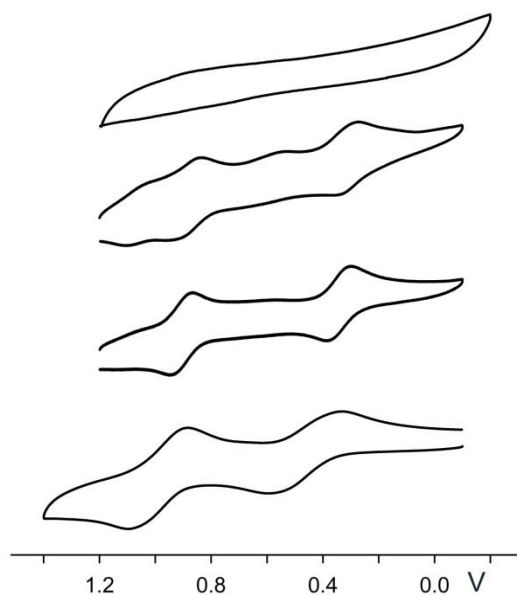

**Fig S5** Change in CV of **1** (bottom) with time as reaction with H<sub>2</sub>O take place to form the redox inactive **2** (top).

**Table 1** Selected bond distances for **2**·4CH<sub>2</sub>Cl<sub>2</sub>.

| <b>Bond</b>        | <b>Distances Å</b>                                     |
|--------------------|--------------------------------------------------------|
| Re–Re (Å)          | 2.2058(11), 2.2066(10)                                 |
| Re–N (Å)           | 2.061(av)                                              |
| Re1–O1             | 1.897(5)                                               |
| Re3–O1             | 1.902(5)                                               |
| Re2–O2             | 1.910(5)                                               |
| Re4–O2             | 1.883(5)                                               |
| Re–L <sub>ax</sub> | 2.514(6), 2.481(6) (OSO <sub>2</sub> CF <sub>3</sub> ) |
| (axial ligand)     | 2.375(6), 2.396(6) (OH)                                |

Table 2 Crystallographic data for 2·4CH<sub>2</sub>Cl<sub>2</sub>.

|                                                 |                                                                                                                                                  |
|-------------------------------------------------|--------------------------------------------------------------------------------------------------------------------------------------------------|
| Chemical formula                                | Re <sub>4</sub> C <sub>46</sub> H <sub>74</sub> N <sub>18</sub> O <sub>16</sub> S <sub>4</sub> F <sub>12</sub> ·4CH <sub>2</sub> Cl <sub>2</sub> |
| Fw                                              | 2575.98                                                                                                                                          |
| Space group                                     | <i>P</i> $\bar{1}$                                                                                                                               |
| <i>a</i> (Å)                                    | 13.399(8)                                                                                                                                        |
| <i>b</i> (Å)                                    | 15.484(10)                                                                                                                                       |
| <i>c</i> (Å)                                    | 20.484(12)                                                                                                                                       |
| $\alpha$ (°)                                    | 80.220(11)                                                                                                                                       |
| $\beta$ (°)                                     | 86.058(11)                                                                                                                                       |
| $\gamma$ (°)                                    | 75.259(10)                                                                                                                                       |
| <i>V</i> (Å <sup>3</sup> )                      | 4049(4)                                                                                                                                          |
| <i>Z</i>                                        | 2                                                                                                                                                |
| <i>d</i> <sub>calcd</sub> (g·cm <sup>-3</sup> ) | 2.113                                                                                                                                            |
| $\mu$ (mm <sup>-1</sup> )                       | 6.425                                                                                                                                            |
| T (K)                                           | 213                                                                                                                                              |
| R1 <sup>a</sup> (wR2 <sup>b</sup> )             | 0.0380 (0.0975)                                                                                                                                  |

<sup>a</sup> R1 =  $[\sum w(F_o - F_c)^2 / \sum wF_o^2]^{1/2}$ . <sup>b</sup> wR2 =  $[\sum [w(F_o^2 - F_c^2)^2] / \sum w(F_o^2)^2]^{1/2}$ ,  
 $w = 1/[\sigma^2(F_o^2) + (aP)^2 + bP]$ , where  $P = [\max(F_o^2, 0) + 2(F_c^2)]/3$ .

## References

---

1 (a) J. F. Berry, F. A. Cotton, P. Huang and C. A. Murillo, *Dalton Trans.*, 2003, 1218; (b) F. A. Cotton, N. S. Dalal, P. Huang, S. A. Ibragimov, C. A. Murillo, P. M. B. Piccoli, C. M. Ramsey, A. J. Schultz, X. Wang and Q. Zhao, *Inorg. Chem.*, 2007, **46**, 1718.

2 *SMART for Windows NT*, version 5.618; Bruker Advanced X-ray Solutions, Inc.: Madison, WI, 2001.

3 *SAINTE. Data Reduction Software. Version 6.36A*; Bruker Advanced X-ray Solutions, Inc.: Madison, WI, 2001.

4 *SADABS. Area Detector Absorption and other Corrections Software, Version 2.05*; Bruker Advanced X-ray Solutions, Inc.: Madison, WI, 2001.

5 G. M. Sheldrick, *SHELXTL, version 6.12*; Bruker Advanced X-ray Solutions, Inc.: Madison, WI, 2002.
